# Supplementary material for: Interaction of ionic liquids with noble metal surfaces: structure formation and stability of [OMIM][TFSA] and [EMIM][TFSA] on Au(111) and Ag(111)
Source: Royal Society of Chemistry journal article supplement (doi:10.1039/c5cp03787e), 2015-01-01
Supplement: c5cp03787e1.pdf [file c5cp03787e1.pdf]

## Supporting Information

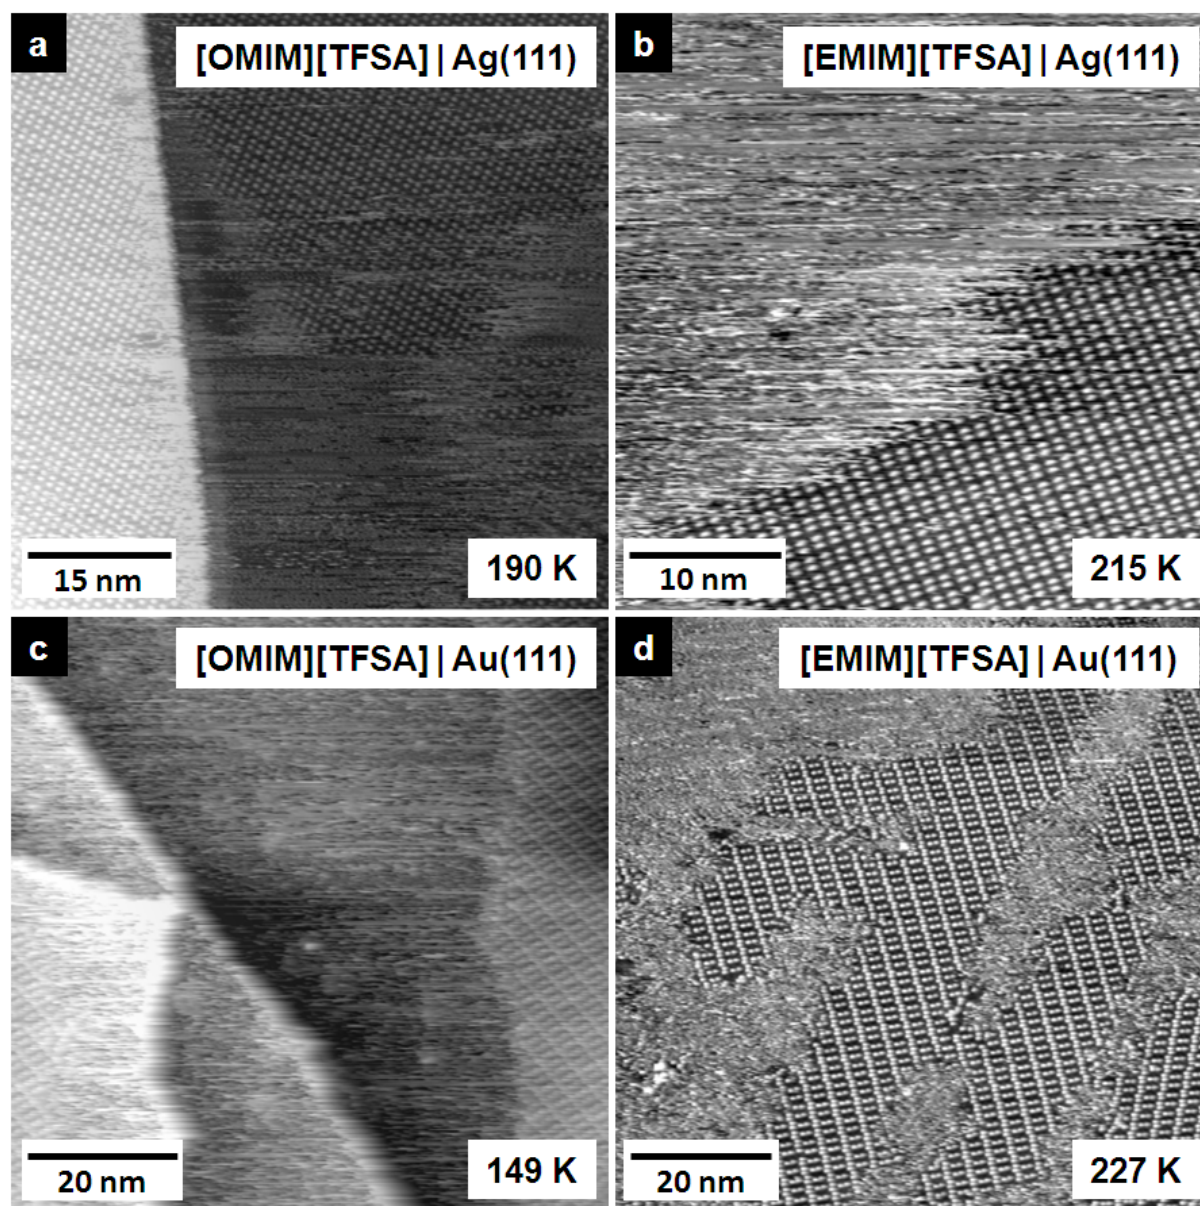

Figure S1: STM images of [EMIM][TFSA] and [OMIM][TFSA] on Ag(111) and Au(111) when heating up from 90 K to RT when the 2D disordered domains are already molten, but with the 2D crystalline domains still stable. (a:  $T = 190$  K,  $U_T = -1.10$  V,  $I_T = 60$  pA; b:  $T = 215$  K,  $U_T = -1.06$  V,  $I_T = 100$  pA; c:  $T = 149$  K,  $U_T = -1.10$  V,  $I_T = 20$  pA; d:  $T = 227$  K,  $U_T = -1.63$  V,  $I_T = 60$  pA;  $\Delta T = \pm 5$  K)
